# Supplementary material for: Impaired Autophagic Clearance with a Gain-of-Function Variant of the Lysosomal Cl−/H+ Exchanger ClC-7
Source: MDPI journal article supplement (doi:10.3390/biom13121799), 2023-12-15
Supplement: s1 [file s1]

Supplementary Figures to  
**Impaired autophagic clearance with a gain-of-function variant  
of the lysosomal Cl<sup>-</sup>/H<sup>+</sup> exchanger CIC-7**

by

Shroddha Bose, Cecilia de Heus, Mary E. Kennedy, Fan Wang, Thomas J. Jentsch, Judith Klumperman and Tobias Stauber

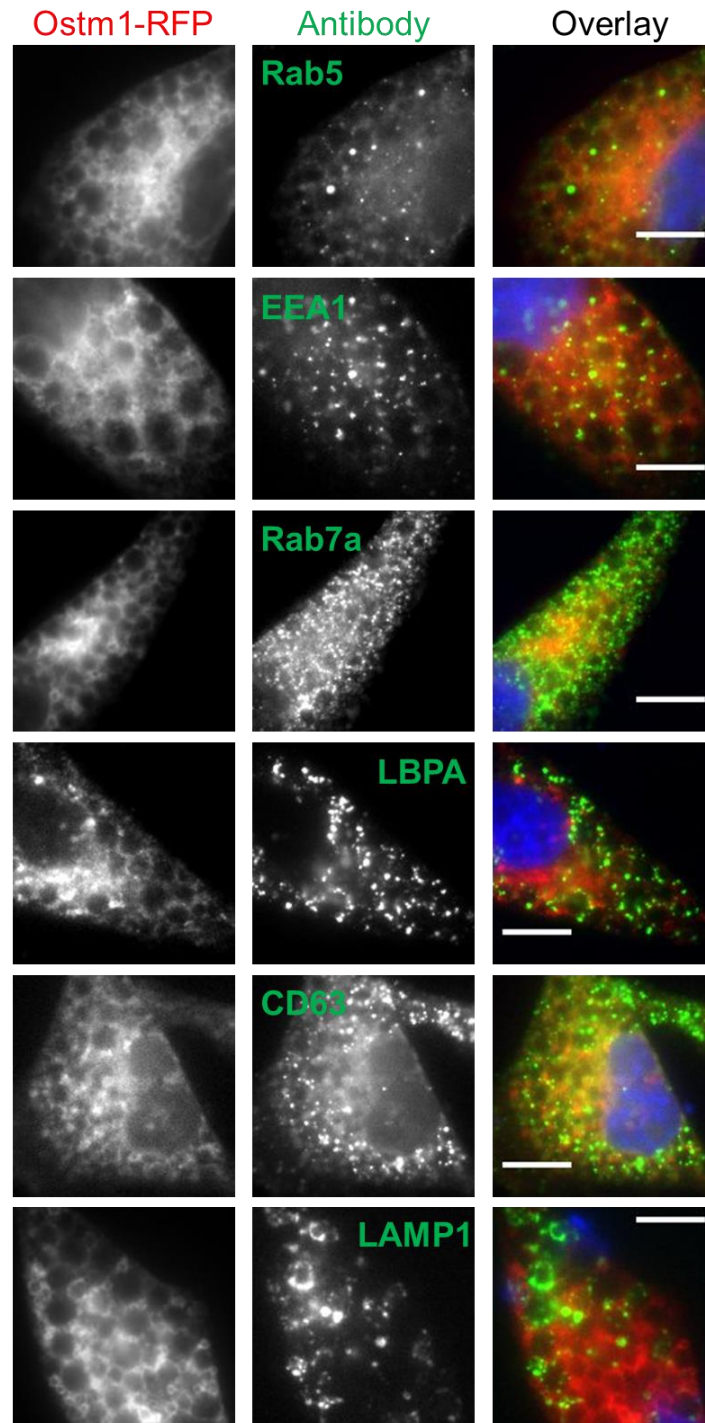

**Figure S1.** Magnifications of images shown in Figure 3A of HeLa cells co-transfected with rCIC-7<sup>Y713F</sup>/Ostm1-RFP (red in overlay) and immune-stained (green in overlay) with antibodies against early endosomes (Rab5, EEA1), late endosomes (Rab7a, LBPA) or lysosomes (CD63, LAMP1). Nuclei were stained with DAPI (blue in overlay). Scale bar, 10  $\mu$ m.

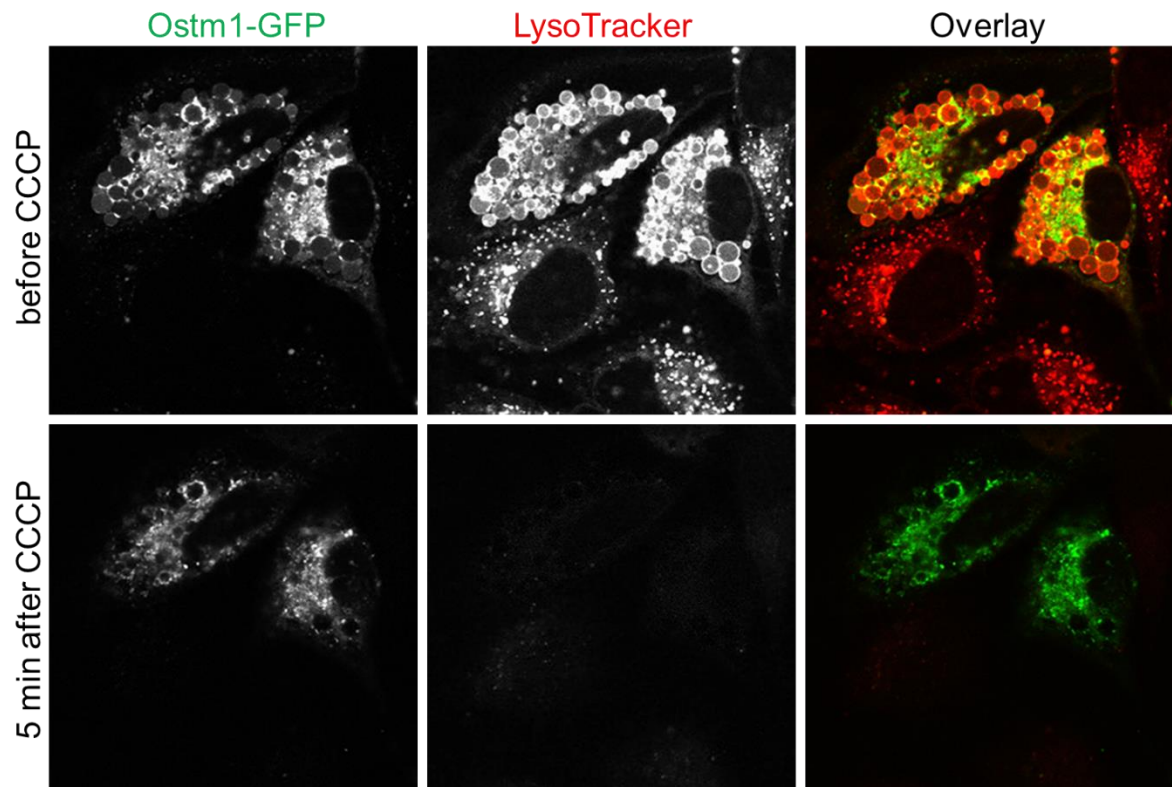

**Figure S2.** LysoTracker staining of enlarged vacuoles. HeLa cells were stained with LysoTracker (red in overlay) 16 h after transfection with rCIC-7<sup>Y713F</sup>/Ostm1-GFP (green in overlay) and imaged before (upper panel) and 5 min after (lower panel) application of the protonophore carbonyl cyanide 3-chlorophenyl hydrazine (CCCP) at 200  $\mu$ M.

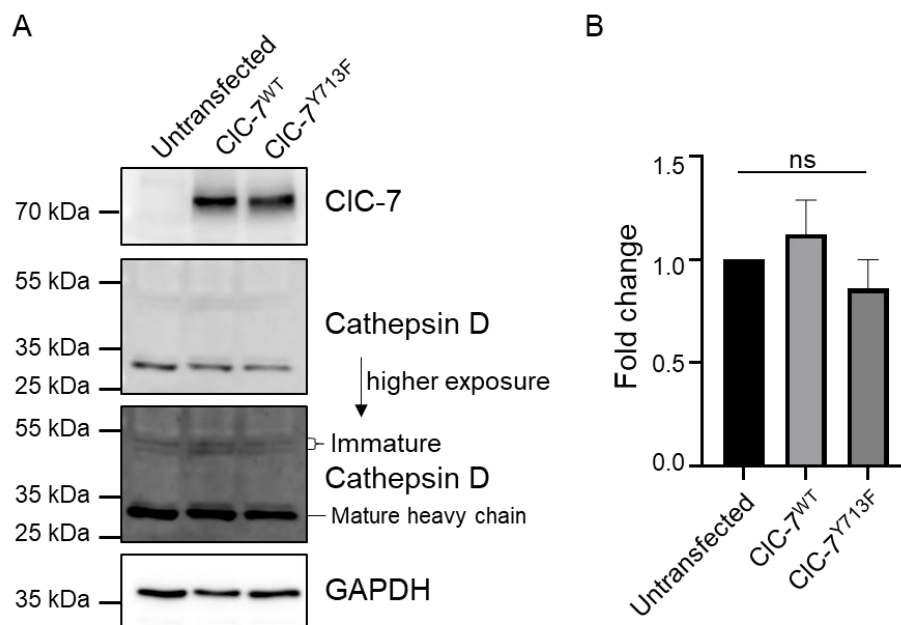

**Figure S3.** Expression levels of cathepsin D. **(A)** Representative immunoblot of proteins from HeLa cells, either untransfected or transfected with rCIC-7<sup>WT</sup>/Ostm1-RFP or rCIC-7<sup>Y713F</sup>/Ostm1-RFP, with antibodies against CIC-7, cathepsin D, and GAPDH as loading control. **(B)** Quantification of immunoblotting as in (A). Protein levels of the mature heavy chain of cathepsin D were not altered in CIC-7<sup>WT</sup>/Ostm1- or CIC-7<sup>Y713F</sup>/Ostm1- transfected cells. Values represent mean  $\pm$  s.e.m from 4 independent experiments. Statistical significance assessed by one-way ANOVA with Tukey's multiple comparison test showed no significance (ns) with  $p > 0.1$ .

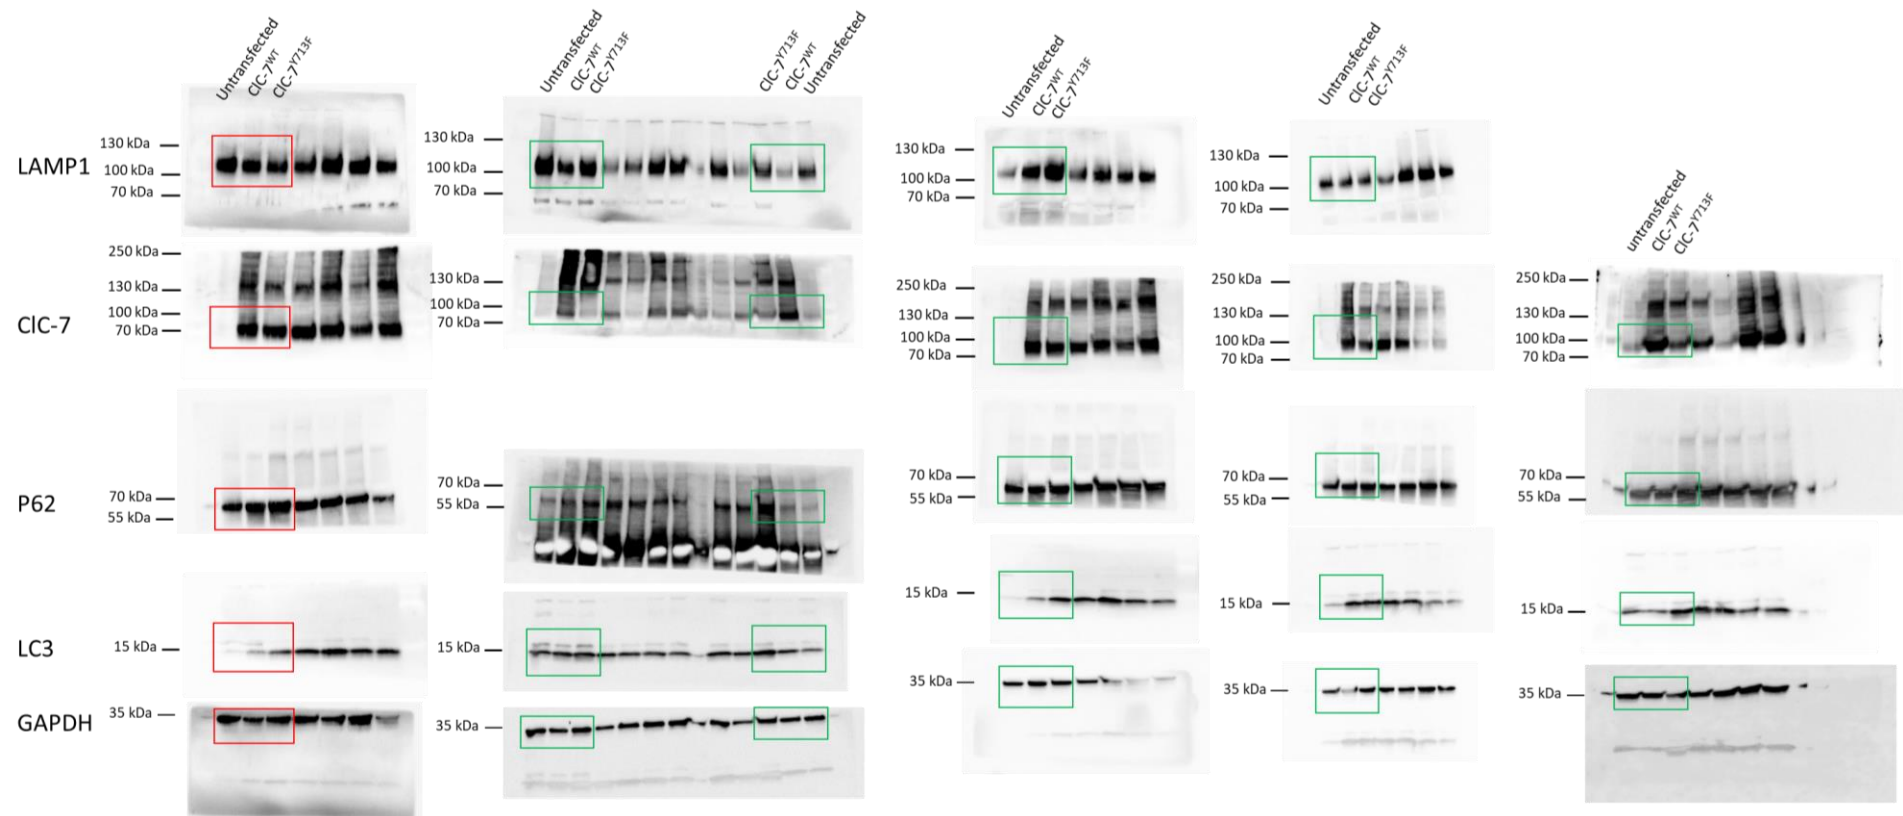

**Figure S4.** Original blot images. Red boxes mark the cropped regions shown in Figure 6A. Green boxes, independent biological replicates used for quantification in Figure 6B.
